# Supplementary material
Source: Elsevier journal article supplement (https://www.sciencedirect.com/science/article/pii/S1695403321002186)
Supplement: mmc1 [file S1695403321002186:mmc1.doc]

**Anexo A**

Resumen del proyecto ECEALHBA

La variabilidad en la práctica médica es una realidad irrefutable en la medicina actual. Esta falta

de homogeneidad en la praxis médica es la expresión de una falta de traslación de las mejores

pruebas científicas a la práctica. Parece ser que la difusión pasiva del conocimiento mediante la

mera publicación de las guías de práctica clínica es menos efectiva que la implementación de las

mismas de una manera práctica, difusión activa. Sobre esta idea surge el proyecto Estudio

Colaborativo Español para la Atención de Lactantes Hospitalizados con Bronquiolitis Aguda

(ECEALHBA) con un doble objetivo, demostrar en qué medida existe esta variabilidad en la

utilización de recursos diagnósticos y terapéuticos para la atención de estos pacientes y cómo una

difusión activa del conocimiento es capaz de mejorar esta situación. Se contactó vía email con

representantes de todos los hospitales del sistema público de 2 sistemas regionales de salud, en la

Comunidad Valenciana y en Castilla La Mancha, invitándoles a participar en el proyecto. Se

trataba de recoger de manera prospectiva mediante una hoja de recogida de datos diseñada a tal

efecto, un conjunto de variables que nos describieran la asistencia que realizamos en estos

pacientes durante su ingreso. En una primera fase se realizaría una comparación entre centros

mediante estos indicadores, y en una segunda fase y tras una intervención práctica solo en aquellos

hospitales que fueran elegidos al azar, se volverían a recoger estos mismos indicadores en todos

los hospitales para evidenciar los posibles cambios acontecidos. El inicio de la primera fase estaba

programado para iniciarse el 1 de septiembre de 2020, finalizando la recogida de datos en mayo

de 2021. Tras ello se produciría la intervención formativa en aquellos hospitales seleccionados,

previa al inicio de la siguiente temporada epidémica de bronquiolitis aguda, recogiéndose las

mismas variables en esta segunda temporada, 2021-22. Por razones obvias este estudio no ha

podido llevarse a cabo como se esperaba y en su lugar se ha realizado un estudio secundario que

trata de comprobar si lo acontecido con la epidemia de bronquiolitis en los países del hemisferio

sur como consecuencia de la COVID-19 es equiparable a lo que está ocurriendo en nuestro medio.

Otros documentos

(Supplementary files)

Definiciones de los indicadores utilizados para caracterizar cada temporada epidémica en el

presente trabajo

- *Temporada epidémica*. De manera amplia y a efectos del estudio, se entiende el periodo de

tiempo que se inicia en septiembre de un año y finaliza en agosto del siguiente.

- *Ingresos por temporada epidémica*. Número absoluto de casos ingresados por temporada.

- *Mes de inicio de temporada efectiva*. Se corresponde con el primer mes, tras el de septiembre,

en el cual se produce un número de ingresos superior al 5% del total de ingresos en esa misma

temporada.

- *Mes de final de temporada efectiva*. De forma análoga al indicador anterior, pero en este caso

se corresponde con el primer mes, tras producirse el pico de ingresos, en el cual se produce

un número de ingresos inferior al 5% del total de ingresos en esa misma temporada.

- *Mes pico de ingresos*. Se corresponde con el mes en el cual se produce el máximo número de

ingresos/mes en la temporada epidémica a la que se refiere.
